# Supplementary material for: Lanthanide CPs: the guest-tunable drastic changes of luminescent quantum yields, and two photon luminescence
Source: Royal Society of Chemistry journal article supplement (doi:10.1039/c3tc32309a), 2014-01-01
Supplement: c3tc32309a1.pdf [file c3tc32309a1.pdf]

# Lanthanide CPs: the Guest-Tunable Drastic Changes of Luminescent Quantum Yields, and Two Photon Luminescence

Cheng-Hui Zeng,<sup>a, b</sup> Jing-Ling Wang,<sup>a</sup> Yang-Yi Yang,<sup>\*a</sup> Tian-Shu Chu,<sup>a</sup> Sheng-Liang Zhong,<sup>b</sup> Seik Weng Ng,<sup>c, d</sup> Wing-Tak Wong<sup>e</sup>

<sup>a</sup> MOE Key Laboratory of Bioinorganic and Synthetic Chemistry, School of Chemistry and Chemical Engineering, Sun Yat-Sen University, Guangzhou, 510275, P. R. China; E-mail: cesyyy@mail.sysu.edu.cn

<sup>b</sup> College of chemistry and chemical engineering, Ministry of Education and Jiangxi's Key Laboratory of green chemistry, Jiangxi Normal University, Nanchang, 330022 P. R. China.

<sup>c</sup> Department of Chemistry, University of Malaya, 50603 Kuala Lumpur, Malaysia;

<sup>d</sup> Chemistry Department, Faculty of Science, King Abdulaziz University, PO Box 80203 Jeddah, Saudi Arabia.

<sup>e</sup> Department of Applied Biology and Chemical Technology, The Hong Kong Polytechnic University, P. R. China

Table S1. Selective bond lengths and angles for **1**, **2**, **3a**, **3b**, **3c** and **4**.

**1**

|                   |            |                   |            |
|-------------------|------------|-------------------|------------|
| Tb(1)-O(4)        | 2.2264(19) | Tb(1)-O(3)        | 2.3463(19) |
| Tb(1)-O(2)        | 2.285(2)   | Tb(1)-N(4)        | 2.612(3)   |
| Tb(1)-O(6)        | 2.3276(19) | Tb(1)-O(5)        | 2.877(2)   |
| Tb(1)-O(1)        | 2.3309(19) | Tb(1)-Tb(1)#1     | 3.9802(3)  |
| Tb(1)-O(5)#1      | 2.343(2)   |                   |            |
| O(4)-Tb(1)-O(2)   | 111.29(8)  | O(5)#1-Tb(1)-O(3) | 140.11(7)  |
| O(2)-Tb(1)-O(6)   | 146.56(7)  | O(4)-Tb(1)-N(4)   | 73.08(8)   |
| O(4)-Tb(1)-O(1)   | 91.73(8)   | O(2)-Tb(1)-N(4)   | 146.82(8)  |
| O(2)-Tb(1)-O(1)   | 96.08(7)   | O(6)-Tb(1)-N(4)   | 74.50(8)   |
| O(6)-Tb(1)-O(1)   | 135.29(7)  | O(1)-Tb(1)-N(4)   | 73.72(8)   |
| O(4)-Tb(1)-O(5)#1 | 82.49(7)   | O(5)#1-Tb(1)-N(4) | 137.97(8)  |
| O(2)-Tb(1)-O(5)#1 | 82.01(8)   | O(3)-Tb(1)-N(4)   | 73.88(8)   |
| O(6)-Tb(1)-O(5)#1 | 73.84(7)   | O(4)-Tb(1)-O(5)   | 161.82(7)  |
| O(1)-Tb(1)-O(5)#1 | 129.05(7)  | O(2)-Tb(1)-O(5)   | 70.24(7)   |
| O(4)-Tb(1)-O(3)   | 75.95(7)   | O(6)-Tb(1)-O(5)   | 48.34(6)   |
| O(2)-Tb(1)-O(3)   | 89.38(7)   | O(1)-Tb(1)-O(5)   | 73.20(7)   |
| O(6)-Tb(1)-O(3)   | 73.32(7)   | O(5)#1-Tb(1)-O(5) | 81.14(7)   |
| O(1)-Tb(1)-O(3)   | 73.89(7)   | O(3)-Tb(1)-O(5)   | 107.99(6)  |
| N(4)-Tb(1)-O(5)   | 116.19(8)  |                   |            |

Symmetry transformations used to generate equivalent atoms: #1 -x+1/2,-y+5/2,-z+2,  
#2 -x+1/2,-y+3/2,-z+2

**2**

|                 |            |                 |            |
|-----------------|------------|-----------------|------------|
| Tb(1)-O(5)      | 2.269(3)   | Tb(1)-O(2)      | 2.358(3)   |
| Tb(1)-O(1)      | 2.300(3)   | Tb(1)-O(6)      | 2.362(3)   |
| Tb(1)-O(3)      | 2.328(3)   | Tb(1)-O(8)      | 2.486(3)   |
| Tb(1)-O(4)      | 2.341(3)   |                 |            |
| O(5)-Tb(1)-O(1) | 83.39(10)  | O(2)-Tb(1)-O(6) | 76.73(9)   |
| O(5)-Tb(1)-O(3) | 132.25(10) | O(5)-Tb(1)-O(8) | 70.19(9)   |
| O(1)-Tb(1)-O(3) | 77.33(9)   | O(1)-Tb(1)-O(8) | 138.09(9)  |
| O(5)-Tb(1)-O(4) | 89.63(9)   | O(3)-Tb(1)-O(8) | 144.20(9)  |
| O(1)-Tb(1)-O(4) | 77.67(9)   | O(4)-Tb(1)-O(8) | 70.44(10)  |
| O(3)-Tb(1)-O(4) | 127.00(10) | O(2)-Tb(1)-O(8) | 75.63(9)   |
| O(5)-Tb(1)-O(2) | 145.80(9)  | O(6)-Tb(1)-O(8) | 76.85(9)   |
| O(1)-Tb(1)-O(2) | 124.94(10) | O(5)-Tb(1)-O(7) | 70.84(9)   |
| O(3)-Tb(1)-O(2) | 77.57(10)  | O(1)-Tb(1)-O(7) | 73.54(10)  |
| O(4)-Tb(1)-O(2) | 79.86(9)   | O(3)-Tb(1)-O(7) | 61.93(9)   |
| O(5)-Tb(1)-O(6) | 94.23(9)   | O(4)-Tb(1)-O(7) | 146.66(9)  |
| O(1)-Tb(1)-O(6) | 138.81(10) | O(2)-Tb(1)-O(7) | 130.97(9)  |
| O(3)-Tb(1)-O(6) | 74.23(9)   | O(6)-Tb(1)-O(7) | 66.99(9)   |
| O(4)-Tb(1)-O(6) | 143.52(10) | O(8)-Tb(1)-O(7) | 123.48(10) |

Symmetry transformations used to generate equivalent atoms: #1 -x+1/2,-y-1/2,-z+1,  
#2 -x+1/2,-y+1/2,-z+1

**3a**

|                    |            |                     |            |
|--------------------|------------|---------------------|------------|
| Tb(1)-O(12)        | 2.257(3)   | Tb(1)-O(1)          | 2.361(3)   |
| Tb(1)-O(7)         | 2.301(3)   | Tb(1)-O(9)          | 2.362(3)   |
| Tb(1)-O(5)         | 2.331(3)   | Tb(1)-O(3)          | 2.395(3)   |
| Tb(1)-O(2)#1       | 2.352(3)   | Tb(1)-O(1)#1        | 2.868(4)   |
| O(12)-Tb(1)-O(7)   | 112.23(11) | O(1)-Tb(1)-O(9)     | 137.31(11) |
| O(12)-Tb(1)-O(5)   | 98.47(11)  | O(12)-Tb(1)-O(3)    | 76.12(12)  |
| O(7)-Tb(1)-O(5)    | 133.85(11) | O(7)-Tb(1)-O(3)     | 147.31(11) |
| O(12)-Tb(1)-O(2)#1 | 148.61(11) | O(5)-Tb(1)-O(3)     | 71.54(11)  |
| O(7)-Tb(1)-O(2)#1  | 84.99(12)  | O(2)#1-Tb(1)-O(3)   | 75.87(12)  |
| O(5)-Tb(1)-O(2)#1  | 85.82(11)  | O(1)-Tb(1)-O(3)     | 138.33(11) |
| O(12)-Tb(1)-O(1)   | 82.70(12)  | O(9)-Tb(1)-O(3)     | 76.52(11)  |
| O(7)-Tb(1)-O(1)    | 74.11(11)  | O(12)-Tb(1)-O(1)#1  | 160.77(11) |
| O(5)-Tb(1)-O(1)    | 76.74(11)  | O(7)-Tb(1)-O(1)#1   | 70.14(10)  |
| O(2)#1-Tb(1)-O(1)  | 128.24(12) | O(5)-Tb(1)-O(1)#1   | 70.02(10)  |
| O(12)-Tb(1)-O(9)   | 85.37(11)  | O(2)#1-Tb(1)-O(1)#1 | 48.59(10)  |
| O(7)-Tb(1)-O(9)    | 72.93(11)  | O(1)-Tb(1)-O(1)#1   | 79.69(12)  |
| O(5)-Tb(1)-O(9)    | 145.75(11) | O(9)-Tb(1)-O(1)#1   | 112.94(10) |
| O(2)#1-Tb(1)-O(9)  | 74.58(11)  | O(3)-Tb(1)-O(1)#1   | 112.74(11) |

Symmetry transformations used to generate equivalent atoms: #1 -x+1,-y,-z+1, #2 -x,-y,-z+1

**3b**

|                     |            |                     |            |
|---------------------|------------|---------------------|------------|
| Gd(1)-O(1)          | 2.261(5)   | Gd(1)-O(2)#2        | 2.370(5)   |
| Gd(1)-O(5)          | 2.314(5)   | Gd(1)-O(3)          | 2.376(5)   |
| Gd(1)-O(6)#1        | 2.341(5)   | Gd(1)-O(7)          | 2.402(5)   |
| Gd(1)-O(4)#1        | 2.359(5)   | Gd(1)-O(3)#1        | 2.833(5)   |
| O(1)-Gd(1)-O(5)     | 111.02(18) | O(2)#2-Gd(1)-O(3)   | 137.61(17) |
| O(1)-Gd(1)-O(6)#1   | 98.73(17)  | O(1)-Gd(1)-O(7)     | 76.48(18)  |
| O(5)-Gd(1)-O(6)#1   | 134.80(17) | O(5)-Gd(1)-O(7)     | 147.20(18) |
| O(5)-Gd(1)-O(4)#1   | 85.96(18)  | O(6)#1-Gd(1)-O(7)   | 71.21(17)  |
| O(6)#1-Gd(1)-O(4)#1 | 85.95(17)  | O(2)#2-Gd(1)-O(7)   | 76.62(17)  |
| O(1)-Gd(1)-O(2)#2   | 85.26(17)  | O(3)-Gd(1)-O(7)     | 138.28(17) |
| O(5)-Gd(1)-O(2)#2   | 72.43(17)  | O(1)-Gd(1)-O(3)#1   | 161.05(16) |
| O(6)#1-Gd(1)-O(2)#2 | 145.54(18) | O(5)-Gd(1)-O(3)#1   | 71.20(16)  |
| O(4)#1-Gd(1)-O(2)#2 | 74.03(17)  | O(6)#1-Gd(1)-O(3)#1 | 70.09(15)  |
| O(1)-Gd(1)-O(3)     | 82.95(17)  | O(4)#1-Gd(1)-O(3)#1 | 49.02(15)  |
| O(5)-Gd(1)-O(3)     | 74.24(17)  | O(2)#2-Gd(1)-O(3)#1 | 112.74(15) |
| O(6)#1-Gd(1)-O(3)   | 76.67(17)  | O(3)-Gd(1)-O(3)#1   | 79.62(16)  |
| O(4)#1-Gd(1)-O(3)   | 128.60(17) | O(7)-Gd(1)-O(3)#1   | 112.36(16) |

Symmetry transformations used to generate equivalent atoms: #1 -x+1,-y+1,-z+1, #2 -x+2,-y+1,-z+1

**3c**

|                     |            |                     |            |
|---------------------|------------|---------------------|------------|
| Eu(1)-O(1)          | 2.280(4)   | Eu(1)-O(2)#2        | 2.385(4)   |
| Eu(1)-O(5)          | 2.327(5)   | Eu(1)-O(3)          | 2.393(4)   |
| Eu(1)-O(6)#1        | 2.348(5)   | Eu(1)-O(7)          | 2.416(4)   |
| Eu(1)-O(4)#1        | 2.384(4)   | Eu(1)-O(3)#1        | 2.811(5)   |
| O(1)-Eu(1)-O(5)     | 110.87(15) | O(2)#2-Eu(1)-O(3)   | 138.00(15) |
| O(1)-Eu(1)-O(6)#1   | 98.26(16)  | O(1)-Eu(1)-O(7)     | 76.48(16)  |
| O(5)-Eu(1)-O(6)#1   | 135.16(16) | O(5)-Eu(1)-O(7)     | 147.18(16) |
| O(1)-Eu(1)-O(4)#1   | 147.75(16) | O(6)#1-Eu(1)-O(7)   | 71.16(16)  |
| O(5)-Eu(1)-O(4)#1   | 86.15(16)  | O(4)#1-Eu(1)-O(7)   | 75.02(17)  |
| O(6)#1-Eu(1)-O(4)#1 | 86.55(16)  | O(2)#2-Eu(1)-O(7)   | 76.38(15)  |
| O(1)-Eu(1)-O(2)#2   | 85.32(15)  | O(3)-Eu(1)-O(7)     | 138.24(16) |
| O(5)-Eu(1)-O(2)#2   | 72.58(15)  | O(1)-Eu(1)-O(3)#1   | 161.16(14) |
| O(6)#1-Eu(1)-O(2)#2 | 145.39(15) | O(5)-Eu(1)-O(3)#1   | 71.33(14)  |
| O(4)#1-Eu(1)-O(2)#2 | 73.61(15)  | O(6)#1-Eu(1)-O(3)#1 | 70.58(14)  |
| O(1)-Eu(1)-O(3)     | 83.06(16)  | O(4)#1-Eu(1)-O(3)#1 | 49.23(14)  |
| O(5)-Eu(1)-O(3)     | 74.29(16)  | O(2)#2-Eu(1)-O(3)#1 | 112.60(14) |
| O(6)#1-Eu(1)-O(3)   | 76.38(15)  | O(3)-Eu(1)-O(3)#1   | 79.60(15)  |
| O(4)#1-Eu(1)-O(3)   | 128.80(16) | O(7)-Eu(1)-O(3)#1   | 112.32(15) |

Symmetry transformations used to generate equivalent atoms: #1 -x+1,-y+1,-z+1,  
#2 -x+2,-y+1,-z+1

#### 4

|                     |          |                     |          |
|---------------------|----------|---------------------|----------|
| Tb(1)-O(3)          | 2.249(6) | Tb(1)-O(4)#2        | 2.348(6) |
| Tb(1)-O(5)          | 2.291(7) | Tb(1)-O(1)#1        | 2.382(7) |
| Tb(1)-O(6)#1        | 2.316(7) | Tb(1)-O(7)          | 2.391(7) |
| Tb(1)-O(2)          | 2.346(7) | Tb(1)-O(1)          | 2.779(7) |
| O(3)-Tb(1)-O(5)     | 111.8(2) | O(4)#2-Tb(1)-O(1)#1 | 133.6(2) |
| O(3)-Tb(1)-O(6)#1   | 96.6(2)  | O(3)-Tb(1)-O(7)     | 77.2(2)  |
| O(5)-Tb(1)-O(6)#1   | 135.1(2) | O(5)-Tb(1)-O(7)     | 147.3(2) |
| O(3)-Tb(1)-O(2)     | 148.8(2) | O(6)#1-Tb(1)-O(7)   | 70.7(2)  |
| O(5)-Tb(1)-O(2)     | 84.2(2)  | O(2)-Tb(1)-O(7)     | 75.7(2)  |
| O(6)#1-Tb(1)-O(2)   | 88.9(2)  | O(4)#2-Tb(1)-O(7)   | 78.6(2)  |
| O(3)-Tb(1)-O(4)#2   | 84.4(2)  | O(1)#1-Tb(1)-O(7)   | 139.7(2) |
| O(5)-Tb(1)-O(4)#2   | 71.5(2)  | O(3)-Tb(1)-O(1)     | 159.9(2) |
| O(6)#1-Tb(1)-O(4)#2 | 148.2(2) | O(5)-Tb(1)-O(1)     | 70.7(2)  |
| O(2)-Tb(1)-O(4)#2   | 75.4(2)  | O(6)#1-Tb(1)-O(1)   | 71.3(2)  |
| O(3)-Tb(1)-O(1)#1   | 82.4(2)  | O(2)-Tb(1)-O(1)     | 49.6(2)  |
| O(5)-Tb(1)-O(1)#1   | 72.7(2)  | O(4)#2-Tb(1)-O(1)   | 114.6(2) |
| O(6)#1-Tb(1)-O(1)#1 | 77.7(2)  | O(1)#1-Tb(1)-O(1)   | 79.4(2)  |
| O(2)-Tb(1)-O(1)#1   | 128.7(2) | O(7)-Tb(1)-O(1)     | 112.0(2) |

Symmetry transformations used to generate equivalent atoms: #1 -x+1,-y+1,-z+1,  
#2 -x+1,-y+1,-z

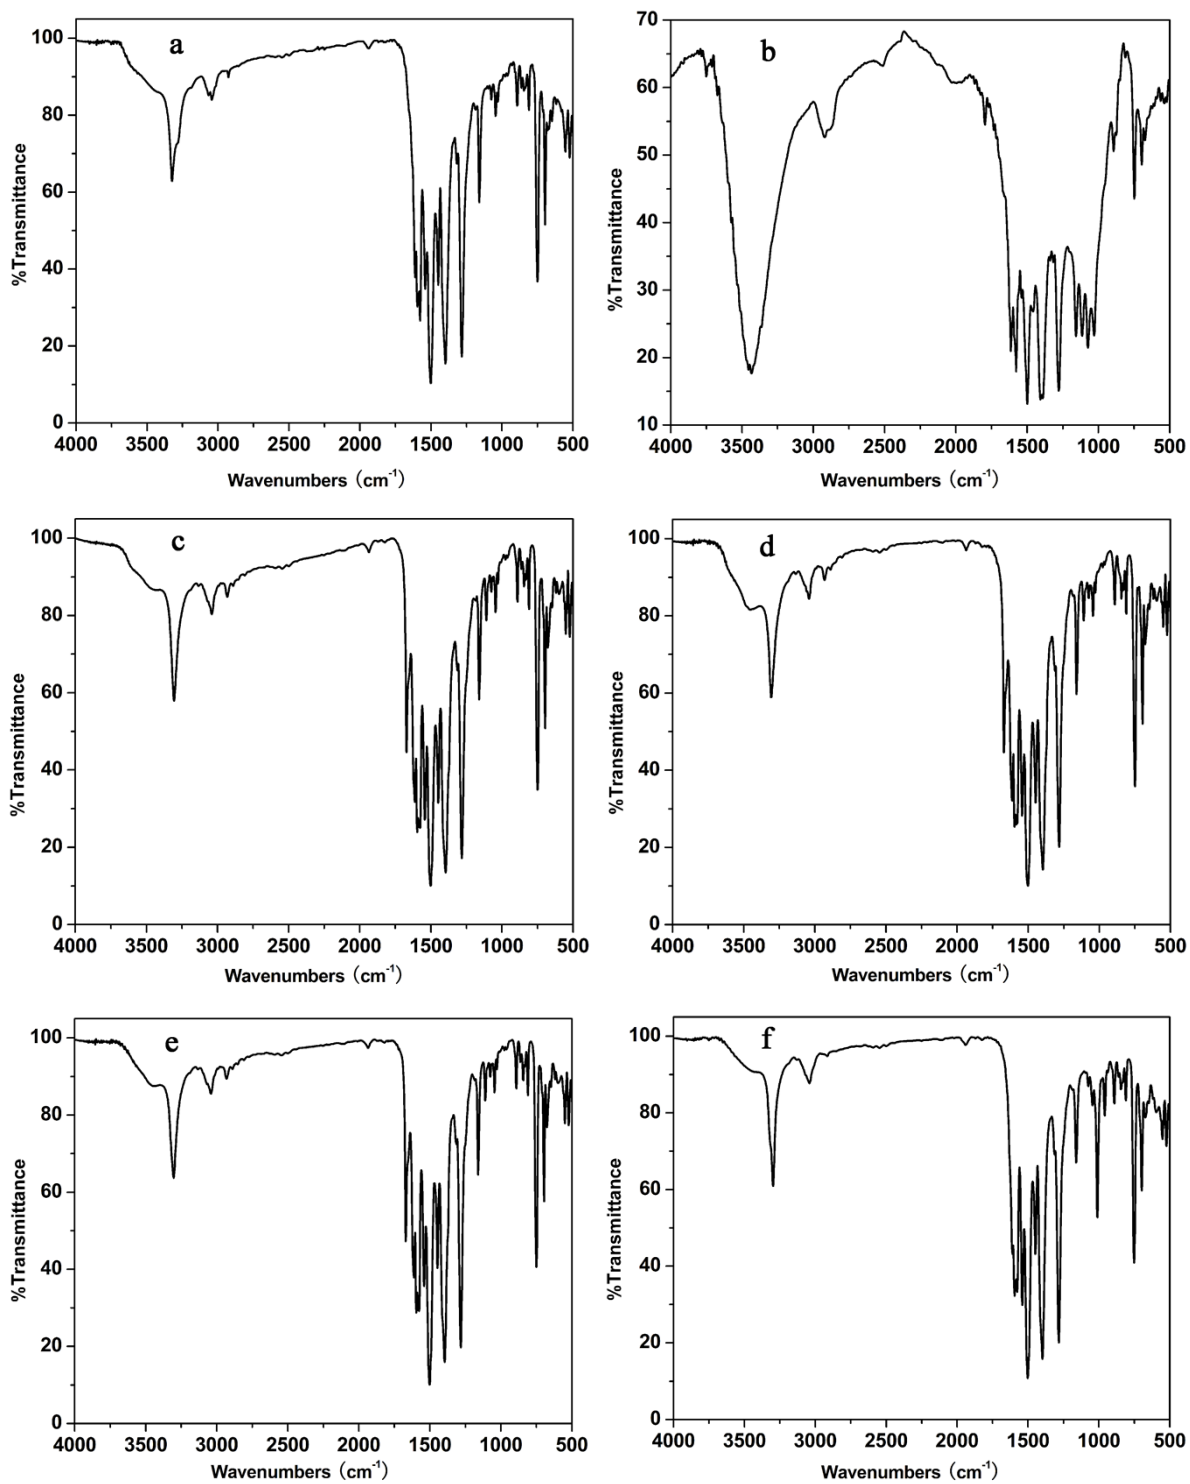

**Figure S1.** FT-IR spectra a-f corresponding to complexes **1**, **2**, **3a**, **3b**, **3c** and **4**, respectively.

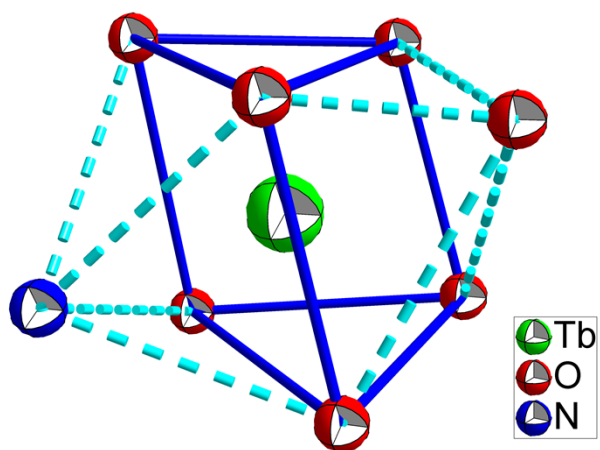

**Figure S2.** Arrangement of the one nitrogen and seven oxygen around  $\text{Tb}^{3+}$  in **1**.

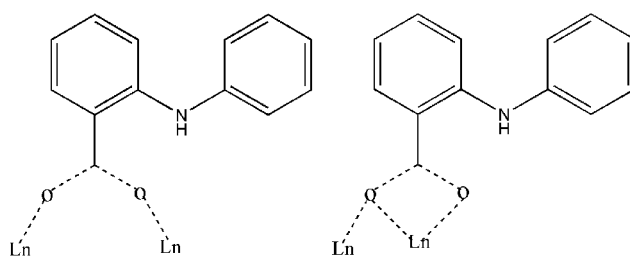

**Figure S3.** Coordination mode of ligands in **1**.

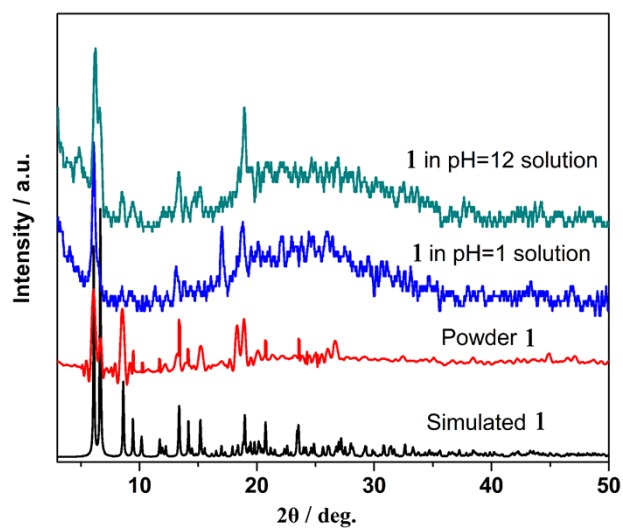

**Figure S4.** PXRD patterns of simulated **1**, as synthesized **1**, powder **1** in  $\text{pH} = 1$  and  $\text{pH} = 12$  water solution.

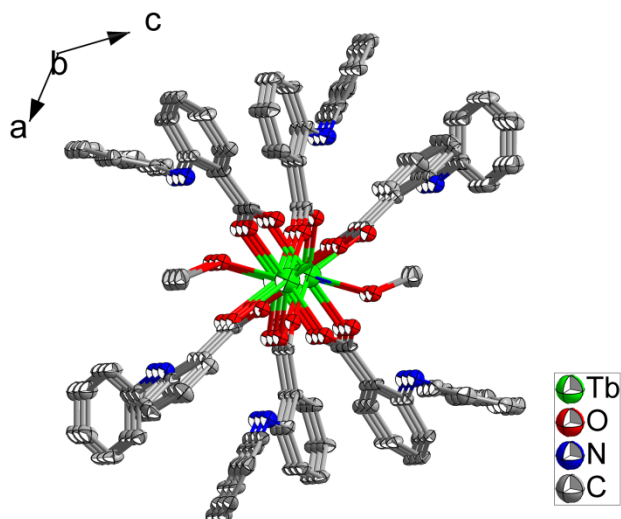

**Figure S5.** Octupolar-like structure of **2** along the *ob* direction.

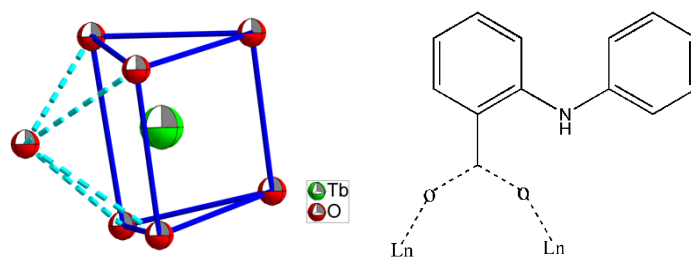

**Figure S6.** Arrangement of the seven oxygen around  $\text{Tb}^{3+}$  (left, a) and coordination mode of ligands in **2** (right, b).

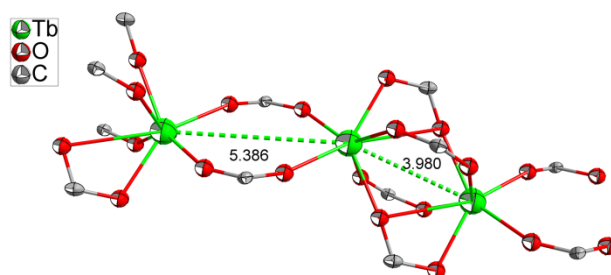

**Figure S7.** Short and long  $\text{Tb}\cdots\text{Tb}$  distances in **2**.

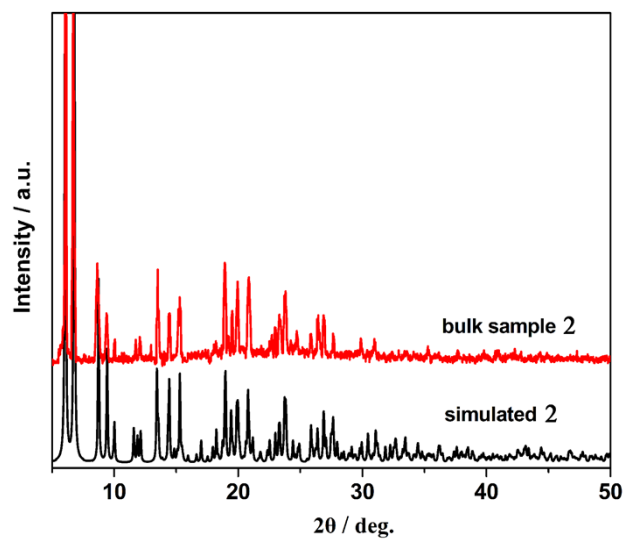

**Figure S8.** PXRd patterns of simulated **2** and as synthesized **2**.

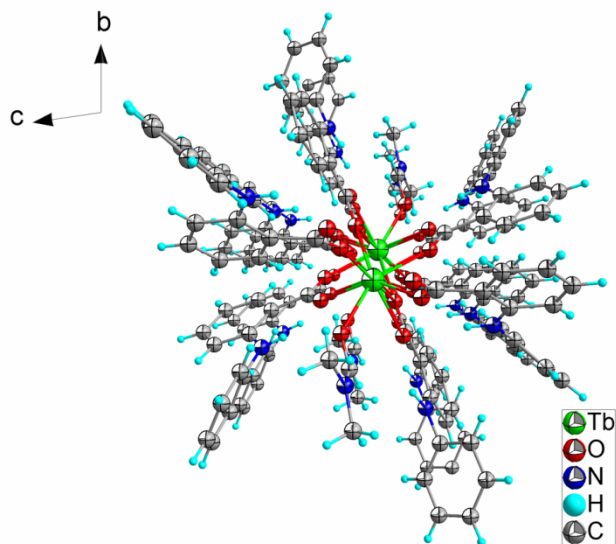

**Figure S9.** 1D structure of **3a** in *oa* direction.



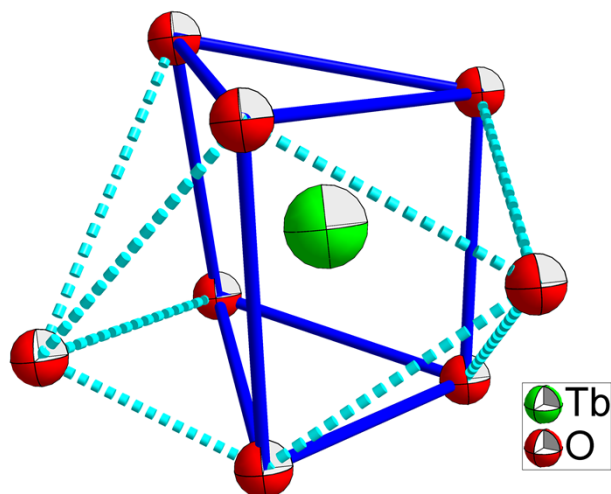

**Figure S10.** Arrangement of the seven oxygen around  $\text{Tb}^{3+}$  in **3a**.

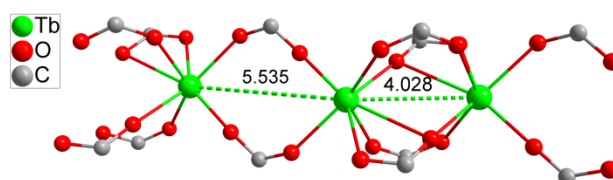

**Figure S11.** Short and long  $\text{Tb}\cdots\text{Tb}$  distances in **3a**.

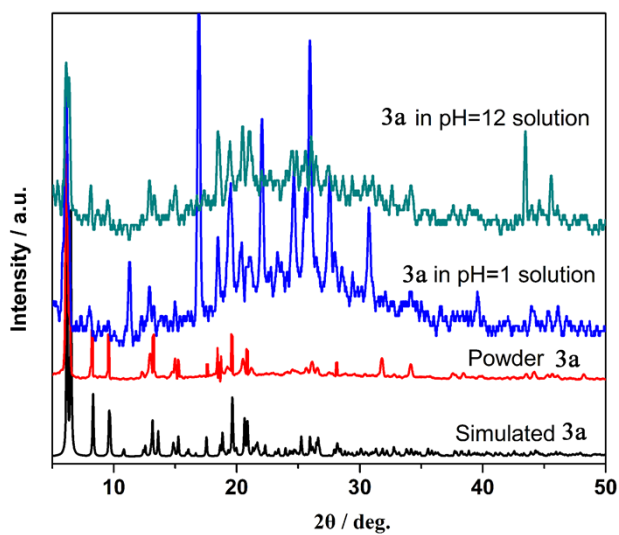

**Figure S12.** PXRD patterns of simulated **3a**, as synthesized **3a**, powder **3a** in  $\text{pH} = 1$  and  $\text{pH} = 12$  water solution.

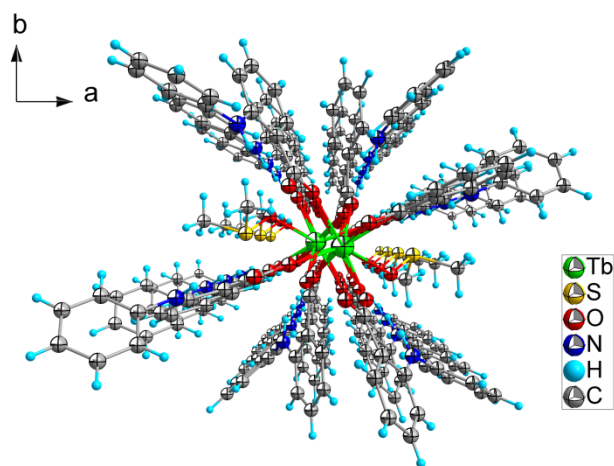

**Figure S13.** 1D structure of **4** along the *oc* direction.

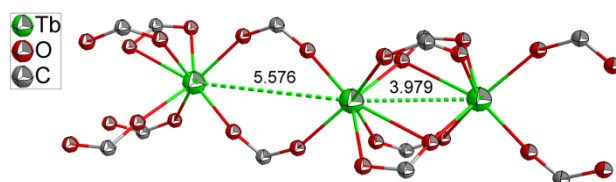

**Figure S14.** Short and long Tb...Tb distances in **4**.

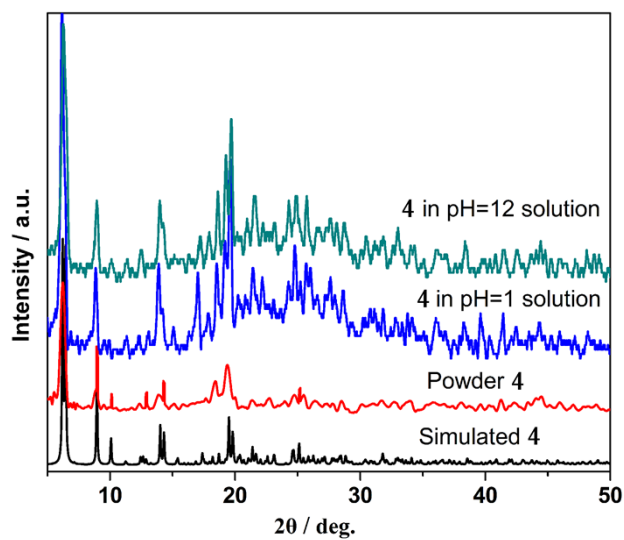

**Figure S15.** PXRD patterns of simulated **4**, as synthesized **4**, powder **4** in pH = 1 and pH = 12 water solution.

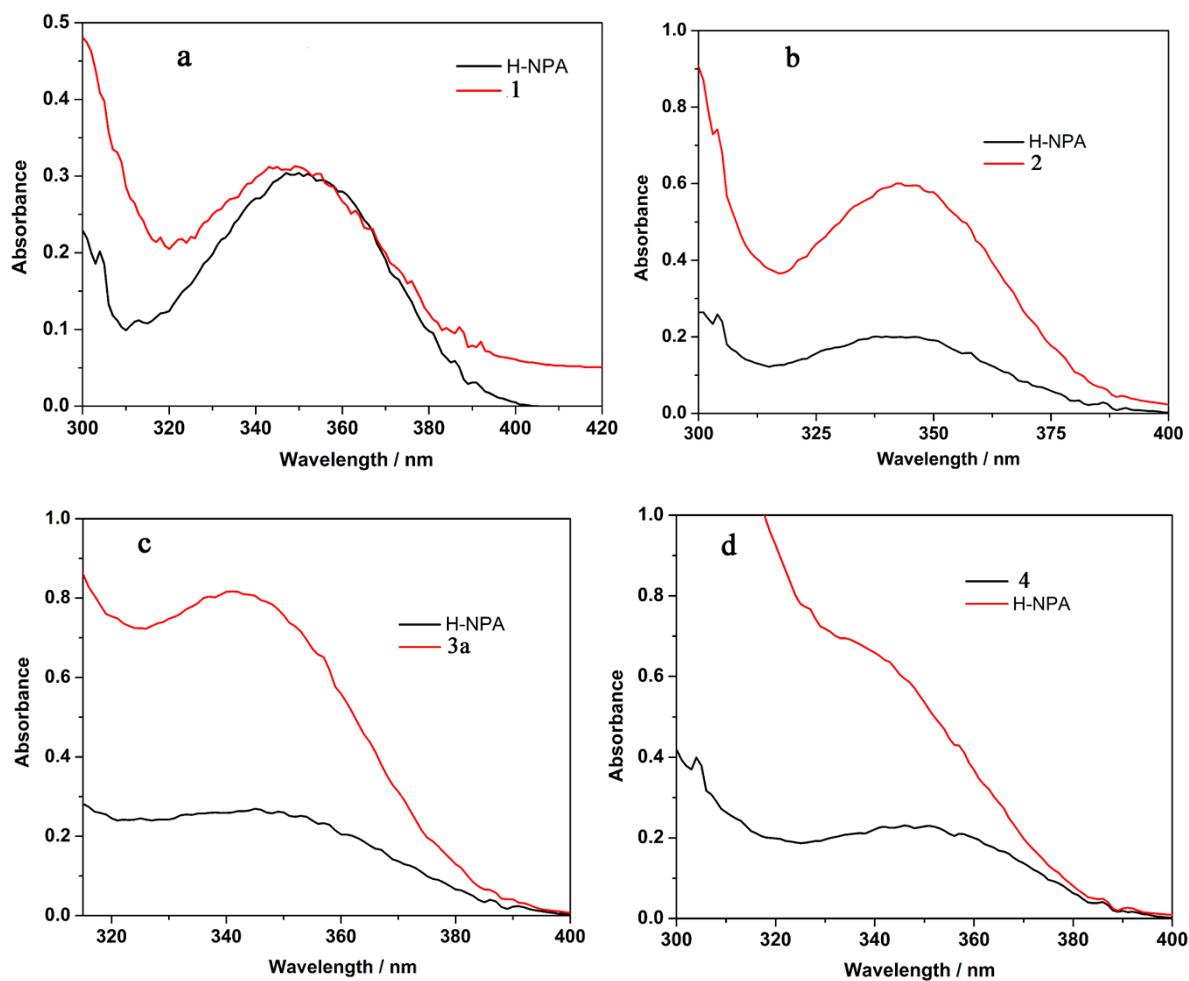

**Figure S16.** Diffuse-reflectance UV–visible spectra of a, b, c and d, which corresponding to complexes 1, 2, 3a and 4.

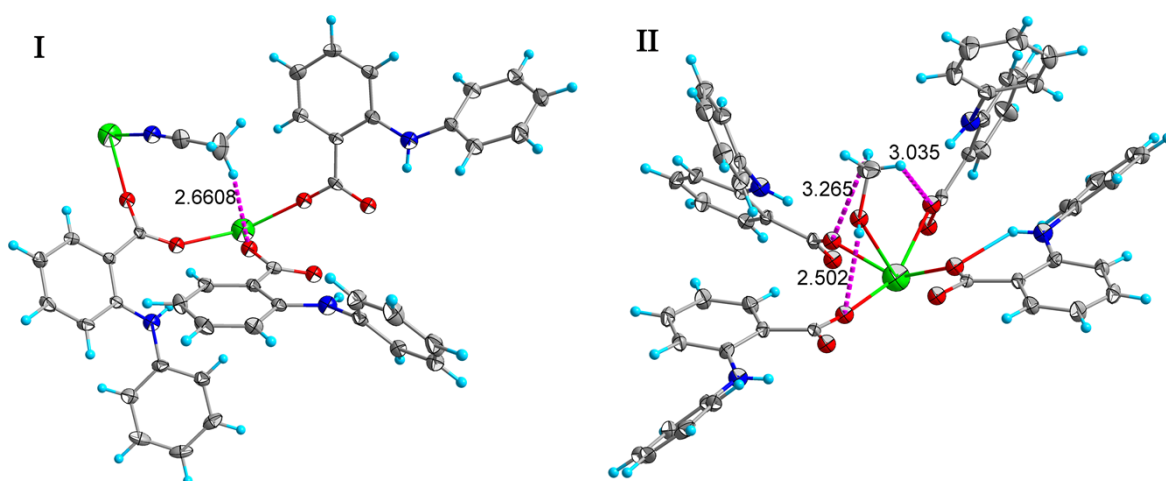

**Figure S17.** Hydrogen bonds of oscillators in coordination solvents for 1(I) and 2(II).
